# Supplementary material
Source: publisher figshare collection journal article supplement (https://sage.figshare.com/ndownloader/files/18725039)
Supplement: Supplementary file 1 [file 18725039]

Appendix 1: The WARM protocol adopted in self-administered acupressure group<sup>a</sup>

| Components          | Duration   | Instruction                                                                                                                                                                                                                                                                                                                                                                                                                                                                                                                                                                                                                                                                                                                                                                                                                                           |
|---------------------|------------|-------------------------------------------------------------------------------------------------------------------------------------------------------------------------------------------------------------------------------------------------------------------------------------------------------------------------------------------------------------------------------------------------------------------------------------------------------------------------------------------------------------------------------------------------------------------------------------------------------------------------------------------------------------------------------------------------------------------------------------------------------------------------------------------------------------------------------------------------------|
| Warm-up             | 2 minutes  | To use one claw-shaped hand to squeeze then move along the front thigh (i.e., quadriceps where meridians liver, spleen, stomach, and gallbladder locate).                                                                                                                                                                                                                                                                                                                                                                                                                                                                                                                                                                                                                                                                                             |
| Acupressure         | 10 minutes | To use fingers to press down the acupoints briskly then release with moderate pressure, and do so repetitively for about 1 minute, for each acupoint (ST34, ST35, ST36, SP9, SP10, GB34, EX-LE2, and EX-LE4). <sup>a</sup>                                                                                                                                                                                                                                                                                                                                                                                                                                                                                                                                                                                                                            |
|                     |            | <p>Location of acupoints</p>     <p>鶴頂穴 EX-LE2      犢鼻穴 ST35      內膝眼穴 EX-LE4      足三里穴 ST36</p>     <p>梁丘穴 ST34      血海穴 SP10      陽陵泉穴 GB34      陰陵泉穴 SP9</p> |
| Rubbing the kneecap | 2 minutes  | To use one palm to cover the kneecap with the assistance of fingers to lift the kneecap lightly, and to move the palm gently in a small circle.                                                                                                                                                                                                                                                                                                                                                                                                                                                                                                                                                                                                                                                                                                       |
| Moving the knee     | 2 minutes  | To extend and rotate the legs when participants sat on a chair with their legs hanging and holding their thighs bilaterally with their hands.                                                                                                                                                                                                                                                                                                                                                                                                                                                                                                                                                                                                                                                                                                         |

<sup>a</sup>The protocol is to be performed on painful knee(s).

Appendix 2: Use of knee osteoarthritis self-care strategies recommended for the Knee Health Education group (n = 18)

| Self-care strategies                                                                                                                                  | Compliance throughout the 6-week study course <sup>a</sup> |
|-------------------------------------------------------------------------------------------------------------------------------------------------------|------------------------------------------------------------|
| Minimize weight bearing of knee joint.<br>For the obese, reduce weight.                                                                               | 74.87%                                                     |
| Avoid carrying heavy objects.<br>Use a trolley.                                                                                                       | 5.82%                                                      |
| Avoid prolonged standing or walking.<br>Use walking aid if required.                                                                                  | 75.53%                                                     |
| Avoid putting the knee joint in one position for a long time,<br>e.g., sitting on low stool or squatting.                                             | 82.67%                                                     |
| Ensure proper balance between work and rest.<br>Watch out for and be mindful of joint pain.                                                           | 93.65%                                                     |
| Appropriate knee exercises and thigh muscle strengthening<br>exercises can protect the knee joint.<br>Consult a doctor or physiotherapist for advice. | 70.50%                                                     |

Reference: Elderly Health Service. Osteoarthritis of Knee: Department of Health Hong Kong Government; 2018 [Available from: [http://www.elderly.gov.hk/english/about\\_us/background.html](http://www.elderly.gov.hk/english/about_us/background.html) accessed 4th Oct 2018].

<sup>a</sup>Calculated by averaging the number of days involving use of the captioned strategy, divided by the total number of days in the study period of the sample
